# Supplementary material
Source: PubMed Central journal article supplement (PMC4498805)
Supplement: NIHMS704649-supplement-1.pdf [file NIHMS704649-supplement-1.pdf]

**- Electronic Supplementary File -  
Characterization of the Z lineage**

**Major histocompatibility complex class I genes in zebrafish**

*Immunogenetics*

Hayley Dirscherl<sup>1,2</sup> and Jeffrey A. Yoder<sup>1,3,\*</sup>

1. Department of Molecular Biomedical Sciences, North Carolina State University, 1060 William Moore Drive, Raleigh, NC 27607 USA
  2. The Joint Biomedical Engineering Graduate Program, University of North Carolina-North Carolina State University, 911 Oval Drive, Raleigh, NC 27695 USA
  3. Center for Comparative Medicine and Translational Research, North Carolina State University, 1060 William Moore Drive, Raleigh, NC 27607 USA
- \* Email: Jeff\_Yoder@ncsu.edu

**>Mhc1zaa<sup>3927</sup> (GenBank KC607829)**

MAVFAVLFSAVMLLAIVPAWTEKHSLYYIYTALSRPVNLPGIHEFTAMGLLDDRQIDYYNSQEQQKIPKQPWMKEKMQEDYWE  
KGTQSRKSKEQWFNVNINILMERMHNKSDVHVLQWRHGCEIESQDNNVRFVSKGIDEYSYDGENFLSFDDADSQWVAPVDAAL  
PTKRKWDNVPILNQYTKGYLEKECVDWLNKFRFYGDEELKQGSAPKVHVFAKRYVNGKAKLKLTLCLATGFYPKDVYLTIRKYR  
TALSDSEVESSGVRPNHDGTFQLRKSITYILEEEKAHEYDCYVAHRTLNLAPVVTTWDGKCSDCSKESAIGLIVGAIIGAVVVAII  
VVVAFILKKNKFCFRRTTQEPSEENGRVLMKDPVFKEENGAGKDPVSVVPLTNGNH-

**>Mhc1zaa<sup>3928</sup> (GenBank KC607830)**

MAVFAVLFSAVMLLAIVPAWTEKHSLYYIYTALSRPVNLPGIHEFTAMGLLDDRQIDYYNSQEQQKIPKQPWMKEKMQEDYWE  
KGTQSRKSKEQWFNVNINILMERMHNKSDVHVLQWRHGCEIESQDNNVWFVSKGIDEYSYDGENFLSFDDADSQWVAPVDAAL  
PTKRKWDNVPILNQYTKGYLEKECVDWLNKFRFYGDEELKQGSAPKVHVFAKRYVNGKAKLKLTLCLATGFYPKDVYLTIRKYR  
TALSDSEVESSGVRPNHDGTFQLRKSITYILEEEKAHEYDCYVAHRTLNLAPVVTTWDGKCSDCSKESAIGLIVGAIIGAVVVAII  
VVVAFILKKNKFCFRRTTQEPSEENGRVLMKDPVFKEENGAGKDPVSVVPLTNGNH-

**>Mhc1zba<sup>3651</sup> (GenBank KC607831)**

MGSFAVLFSAVMLVAVVPAWTEKHSLYYIYTALSRPVNLPGIYEFTAMGLLDDRQIDYYNSEQQKIPKQHWMEKMQEDYWE  
KGTQSRKSKEQWFNVNINILMERMHNKSDVHVLQWRHGCEIESQDNDVRFVSRGIDEYSYDGRNFLSFDDAESQWVAPVEEAL  
PTKRKWDNVPILNQYTKGYLEKECVDWLNKFRFYGDKEKELREGSSPEVHVFAKRIINGKIKLKLTLCLATGFYPKDVILNIRKYR  
ITLDPNEVESTGVRPNEDGTFQLRKSINIYEDEKAHEYDCYVSHSTTLKEPIIKKWDGECLEDPESGSPIGI IAGAIIVVLVLA  
AIGGAVYFLRKRSGNNNVKPSVPTISGNKDEKCSMLPGSDDSGQSSDGSKSSPTNSQEKMDIV-

**>Mhc1zba<sup>3652</sup> (GenBank KC607832)**

MGSFAVLFSAVMLVAVVPAWTEKHSLYYIYTALSRPVNLPGIYEFTAMGLLDDRQIDYYNSEQQKIPKQHWMEKMQEDYWE  
KGTQSRKSKEQWFNVNINILMERMNNKSDVHVLQWRHGCEIESQDNDVRFVSRGIDEYSYDGRNFLSFDDAESQWVAPVEEAL  
PTKRKWDNVPILNQYTKGYLEKECVDWLNKFRFYGDKEKELREGSSPEVHVFAKRIINGKIKLKLTLCLATGFYPKDVILNIRKYR  
ITLDPNEVESTGVRPNEDGTFQLRKSINIYEDEKAHEYDCYVSHSTTLKEPIIKKWDGECLEDPESGSPIGI IAGAIIVVLVLA  
AIGGAVYFLRKRSGNNNVKPSVPTISGNKDEKCSMLPGSDDSGQSSDGSKSSPTNSQEKMDIV-

**>Mhc1zba<sup>3656</sup> (GenBank KC607833)**

MGSFAVLFSAVMLVAVVPAWTEKHSLYYIYTALSRPVNLPGIYEFTAMGLLDDRQIDYYNSEQQKIPKQHWMEKMQEDYWE  
KGTQSRKSKEQWFNVNINILMERMHNKSDVHVLQWRHGCEIESQDNDVRFVSRGIDEYSYDGRNFLSFDDAESQWVAPVEEAL  
PTKRKWDNVPILNQYTKGYLEKECVDWLNKFRFYGDKEKELREGSSPEVHVFAKRIINGKIKLKLTLCLATGFYPKDVILNIRKYR  
ITLDPNEVESTGVRPNEDGTFQLRKSINIYEVEKAHEYDCYVSHSTTLKEPIIKKWDGECLEDPESGSPIGI IAGAIIVVLVLA  
AIGGAVYFLRKRSGNNNVKPSVPTISGNKDEKCSMLPGSDDSGQSSDGSKSSPTNSQEKMDIV-

**>Mhc1zba<sup>3662</sup> (GenBank KC607834)**

MGSFAVLFSAVMLLAVVPAWTEKHSLYYIYTALSRPVNLPGIYEFTAMGLLDDRQIDYYNSQEQQKIPKQHWMEKMQEDYWE  
KGTQSRKSKEQWFNVNINILMERMHNKSDVHVLQWRHGCEIDSQDDVRFVSRGIDEYSYDGRNFLSFDDAESQWVAPVEEAL  
PTKRKWDNVPILNQYTKGYLEKECVDWLNKFRFYGDKEKELREGSSPEVHVFAKRIINGKIKLKLTLCLATGFYPKDVILNIRKYR  
ITLDPNEVESTGVRPNEDGTFQLRKSINIYEDEKAHEYDCYVSHSTTLKEPIIKKWDGECLEDPESGSPIGI IAGAIIVVLVLA  
AIGGAVYFLRKRSGNNNVKPSVPTISGNKDEKCSMLPGSDDSGQSSDGSKSSPTNSQEKMDIV-

>Mhc1zca<sup>3774</sup> (GenBank KC607835)

MAVLAVLFSAVMLLSVVSVRTEKHSLYIYTALSRPVDQSGIYQFTAMGLLDDRQIDYYNNIDQKKIPKQHWMEKMQEDYWE  
KGTQSRKSKEQWFNVNVNINILMDRMRHNNSDLHVLQWRHGCEIEIQGNEHRFSKGIDEYSYDGRNFLSFDDAESQWVAPVDAAL  
PTKRKWDNVPILNQYTKGYLEKECVDWLNKRFREYGDQELRDGSPDPVYVFARRIISGKIKLKLTCMATGFYPKDMILTIRKYR  
TTLPDNDLSDSSGVRPNQDGTFLRKSTNIYEDEKAEYDCYVNHRTLKEPIIVRWNGEYLSPEPIAIIAAIIGVLLILLVAIGVT  
VWILKKNIIIGNKDEKRSMPPNGSANYGRGSSA-

>Mhc1zca<sup>3919</sup> (GenBank KC607836)

MAVLAVLFSAVMLLSVVSVRTEKHSLYIYTALSRPVDQSGIYQFTAMGLLDDRQIDYYNNIDQKKIPKQHWMEKMQEDYWE  
KGTQSRKSKEQWFNVNVNINILMDRMRHNNSDLHVLQWRHGCEIEIQGNEHRFSKGIDEYSYDGRNFLSFDDAESQWVAPVDAAL  
PTKRKWDNVPILNQYTKGYLEKECVDWLNKRFREYGDQELRDGYGEYLSPEPIAIIAAIIGVLLILLVAIGVTVWILKKNIIIGN  
KDEKRSMPPNGSANYGRGSSA-

>Mhc1zca<sup>3777</sup> (GenBank KC607837)

MAVLAVLFSAVMLLSVVSVRTEKHSLYIYTALSRPVDQSGIYQFTAMGLLDDRQIDYYNNIDQKKIPKQHWMEKMQEDYWE  
KGTQSRKSKEQWFNVNVNINILMDRMRHNNSDLHVLQWRHGCEIEIQGNEHRFSKGIDEYSYDGRNFLSFDDAESQWVAPVDAAL  
PTKRKWDNVPILNQYTKGYLEKECVDWLNKRFREYGDQELRDGSPDPVYVFARRIISGKIKLKLTCMATGFYPKDMILTIRKYR  
TTLPDNDLSDSSGVRPNQDGTFLRKSTNIYEDEKVEYDCYVNHRTLKEPIIVRWNGEYLSPEPIAIIAAIIGVLLILLVAIGVT  
VWILKKNIIIGNKDEKRSMPPNGSANYGRGSSA-

>Mhc1zca<sup>3790</sup> (GenBank KC607838)

MAVLAVLFSAVMLLFVVPWATEKHSLYIYTALSRPVDQSGIYQFTAMGLLDDRKIDYYNNIDQKRIPKQHWMEKMQEDYWE  
KGTQSRKSKEQWFNVNVNINILMDRMRHNNSDLHVLQWRHGCEIESQGNEHRFSKGIDEYSYDGENFLAFDDAESQWVAPVEEAL  
PTKRKWDNVPILNQYTKAYLEKECVDWLNKRFREYGDQELREGSPDPVHVVFARRIISGKIKLKLTCMATGFYPKDMILTIRKYR  
MALPDNNLESSGVRPNQDGTFLRKNTYIDEDEKAEYDCYVDHRTLKEPIIVRWYGEYLSPEPIAILAAIIGVLLILLVAIGVT  
VWILKKNIIIGNKDEKRSMPPNGSANYGIGSGA-

>Mhc1zca<sup>3788</sup> (GenBank KC607839)

MAVLAVLFSAVMLLFVVPWATEKHSLYIYTALSRPVDQSGIYQFTAMGLLDDRKIDYYNNIDQKRIPKQHWMEKMQEDYWE  
KGTQSRKSKEQWFNVNVNINILMDRMRHNNSDLHVLQWRHGCEIESQGNEHRFSKGIDEYSYDGENFLAFDDAESQWVAPVEEAL  
PTKRKWDNVPILNQYTKAYLEKECVDWLNKRFREYGDQELREGSPDPVHVVFARRIISGKIKLKLTCMATGFYPKDMILTIRKYR  
MALPDNNLESSGVRPNQDGTFLRKNTYIDEDEKAEYDCYVDHRTLKEPIIVRWCNQS IQYHFRTSTFFCQN-

>Mhc1zca<sup>3787</sup> (GenBank KC607840)

MAVLAVLFSAVMLLFVVPWATEKHSLYIYTALSRPVDQSGIYQFTAMGLLDDRKIDYYNNIDQKRIPKQHWMEKMQEDYWE  
KGTQSRKSKEQWFNVNVNINILMDRMRHNNSDLHVLQWRHGCEIESQGNEHRFSKGIDEYSYDGENFLAFDDAESQWVAPVEEAL  
PTKRKWDNVPILNQYTKAYLEKECVDWLNKRFREYGDQELREGSPDPVHVVFTRRIISGKIKLKLTCMATGFYPKDMILTIRKYR  
MALPDNNLESSGVRPNQDGTFLRKNTYIDEDEKAEYDCYVDHRTLKEPIIVRWYGEYLSPEPIAILAAIIGVLLILLVAIGVT  
VWILKKNIIIGNKDEKRSMPPNGSANYGIGSGA-

>Mhc1zca<sup>3792</sup> (GenBank KC607841)

MAVLAVLFSAVMLLFVVPWATEKHSLYIYTALSRPVDQSGIYQFTAMGLLDDRQIDYYNSIEQKKIPKQHWMEKMQEDYWE  
KGTQSRKSKEQWFNVNVNINILMDRMRHNNSDLHVLQWRHGCEIESQGNEHRFSKGIDEYSYDGENFLAFDDAESQWVAPVDAAL  
PTKRKWDNVPILNQYTKGYLEKECVDWLNKRFREYGDQELRDGSA PDVYVFARRIISDKIKLKLTCMATGFYPKDVYLTIRKYC  
MALPDKEFEFSGVRPNPDGTFLRKSTYILEDEKAEYDCYVNHRTLKEPIIVRWNGECLSEPIAMIAGIIGVFILLGAIGVT  
VWILKKNIIIGNKDEKRSMPPNGSANSGRGNSA-

>Mhc1zca<sup>3794</sup> (GenBank KC607842)

MAVLAVLFSAVMLLFVVPWATEKHSLYIYTALSRPVDQSGIYQFTAMGLLDDRQIDYYNSIEQKKIPKQHWMEKMQEDYWE  
KGTQSRKSKEQWFNVNVNINILMDRMRHNNSDLHVLQWRHGCEIESQGNEHRFSKGIDEYSYDGENFLAFDDAESQWVAPVDAAL  
PTKRKWDNVPILNQYTKGYLEKECVDWLNKRFREYGDQELRDGYGECLSEPIAMIAGIIGVFILLGAIGVTVWILKKNIIIGN  
KDEKRSMPPNGSANSGRGNSA-

>Mhc1zda<sup>4104</sup> (GenBank KC607843)

MAVFFVLLAVMLLDVEPATTEKHSLYIYTALSRPVNLPGIYEFTAMGLLDDRQIDYYNSQEQQKIPKQHWMEKMQEDYWE  
KGTQSRKSKEQWFNVNVNINILMDRMRHNKSDVHVLQWRHGCEIDSQDDVRFVSKGIDEYSYDGENFLSFDDADSQWVAPVDAAL  
PTKRKWDNVPILNQYTKGYLEKECVDWLNKRFREYGDDEELREGSPDPVHVVFARSIINGKAKLKLTCMATGFYPKDVYLTIRKYR  
MALSDKDLESSGVRPNHDGTFLRKSTYIYEDEKAEYDCYVKHRTLGAPIIKKWDGKCSDCSKVTFLGMIVGAIIGAVLVLTIV  
IGLVILVLRTRKKAPKPFYKNGIGDNDPSAIIPLNNNQHI EPSVKE SKNKPTAAEQSTSGDLKS-

>Mhc1zda<sup>4113</sup> (GenBank KC607844)

MAV FV V L L L L A V M L L D V E P A T T E K H S L Y Y I Y T A L S R P V N L P G I Y E F T A M G L L D D R Q I D Y Y N S Q E Q K K I P K Q H W M K E K M Q E D Y W E  
K G T Q S R K S K E Q W F N V N V N I L M D R M R H N K S D V H V L Q W R H G C E I D S Q D D D V R F S K G I D E Y S Y D G E N F L S F D D A D S Q W V A P V D A A L  
P T K R K W D N V P I L N Q Y T K G Y L E K E C V D W L N K F R E Y G D E E L R E G S P P D V H V F A R S I I N G K A K L K L T C L A T G F Y P K D V Y L T I R K Y R  
M A L S D K D L E S S G V R P N H D G T F Q L R K S T Y I Y E D E K A E Y D C Y V K H R T L G A P I I K K W D G K C S D C S K V T F L G M I V G A I I G A V L V L T V  
I G L V I L V L T R K K G I G D N D P S A I P L N N N Q H I E P S V K E S K N K P T A A E G Q S T S G D L K S -

>Mhc1zda<sup>4097</sup> (GenBank KC607845)

MAV FV V L L L L A V M L L D V E P A T T E K H S L Y Y I Y T A L S R P V D L P G I Y E F T A M G L L D D R Q I D Y Y N S Q E Q K K I P K Q H W M K E K M Q E D Y W E  
K G T Q S R K S K E Q W F N V N V N I L M D R M R Q N K S D L H V L Q W R H G C E I D S Q D D D V R F S K G I D E Y S Y D G E N F L S F D D A D S Q W V A P V D A A L  
P T K R K W D N V P I L N Q Y T K G Y L E K E C V D W L N K F R E Y E D E E L R E G S P P D V H V F A R S I I N G K A K L K L T C L A T G F Y P K D V Y L T I R K Y R  
M A L S D K D L E S S G V R P N H D G T F Q L R K S T Y I Y E D E K A E Y D C Y V K H R T L G A P I I K K W D G K C S D C S K V T F L G M I V G A I I G A V L V L T V  
I G L V I L V L T I K K A P K K P F Y K N G I G D N D P S A I P L N N N Q H I E P S V K E S K N K P T A A E G Q S T S G D L K S -

>Mhc1zda<sup>4098</sup> (GenBank KC607846)

MAV FV V L L L L A V M L L D V E P A T T E K H S L Y Y I Y T A L S R P V D L P G I Y E F T A M G L L D D R Q I D Y Y N S Q E Q K K I P K Q H W M K E K M Q E D Y W E  
K G T Q S R K S K E Q W F N V N V N I L M D R M R Q N K S D L H V L Q W R H G C E I D S Q D D D V R F S K G I D E Y S Y D G E N F L S F D D A D S Q W V A P V D A A L  
P T K R K W D N V P I L N Q Y T K G Y L E K E C V D W L N K F R E Y E D E E L R E G S P P D V H V F A R S I I N G K A K L K L T C L A T G F Y P K D V Y L T I R K Y R  
M A L S D K D L E S S G V R P N H D G T F Q L R K S T Y I Y E D E K A E Y D C Y V K H R T L G A P I I K K W D G K C S D C S K V T F L G M I V G A I I G A V L V L T V  
I G L V I L V L T I K K G I G D N D P S A I P L N N N Q H I E P S V K E S K N K P T A A E G Q S T S G D L K S -

>Mhc1zda<sup>4096</sup> (GenBank KC607847)

MAV FV V L L L L A V M L L D V E P A T T E K H S L Y Y I Y T A L S R P V D L P G I Y E F T A M G L L D D R Q I D Y Y N S Q E Q K K I P K Q H W M K E K M Q E D Y W E  
K G T Q S R K S K E Q W F N V N V N I L M D R M R Q N K S D L H V L Q W R H G C E I D S Q D D D V R F S K G I D E Y S Y D G E N F L S F D D A D S Q W V A P V D A A L  
P T K R K W D N V P I L N Q Y T K G Y L E K E C V D W L N K F R E Y E D E E L R E G S P P D V H V F A R S I I N G K A K L K L T C L A T G F Y P K D V Y L T I R K Y R  
M A L S D K D L E S S G V R P N H D G T F Q L R K S T Y I Y E D E K A E Y D C Y V K H R T L G A P I I K K W D G K C S D C S K V T F L G M I V G A I I G V V L V L T V  
I G L V I L V L T I K K G I G D N D P S A I P L N N N Q H I E P S V K E S K N K P T A A E G Q S T S G D L K S -

>Mhc1zda<sup>4108</sup> (GenBank KC607848)

MAV FV V L L L L A V M L L D V E P A T T E K H S L Y Y I Y T A L S R P V D L P G I Y E F T A M G L L D D R Q I D Y Y N S Q E Q K K I P K Q H W M K E R M Q E D Y W E  
K G T Q S R K S K E Q W F N V N V N I L M D R M R H N K S D L H V L Q W R H G C E I D S Q D D D V R F S K G I D E Y S Y D G E N F L S F D D A D S Q W V A P V D A A L  
P T K R K W D N V P I L N Q Y T K G Y L E K E C V D W L N K F R E Y G D E E L R E G S P P D V H V F A R S I I N G K A K L K L T C L A T G F Y P K D V Y L T I R K Y R  
M A L P D K E F E S S G V R P N H D G T F Q L R K S T Y I Y E D E K A E Y D C Y V N H T T L G A P I I K K W D G K C S D C S K V T F L G M I V G A I I G A V L V L T V  
I G L V I L V L T R K K A P K K P F Y K N G I G D N D P S A I P L N N N Q H I E P S V K E S K N K P T A A E G Q S T S G D L K S -

>Mhc1zea<sup>3669</sup> (GenBank KC607850)

MAV F A A L F S V V M L F T V V P A W T E K H S L Y Y I Y T A L S R P V H L P G I Y E F T A M G L L D D R Q I D Y Y N S Q E Q K K I P K Q H W M K E K M Q E D Y W E  
K G T Q S R K S K E Q W F N V N L K I L M E R M R H N N S D V H V L Q W R H G C E I D S Q G N D V R F S K G I D E Y S Y D G R N F L A F D D A D S Q W V A P V E E A  
L P T K R K W D N V P I L N Q Y T K G Y L E K E C V D W L N K F R E Y G D Q E L R E G S P P D V H V F A K K I I S G K A K L K L T C M V T G F Y P K D V I L T I R K Y  
R T A L S D N E V E S S G V R P N P D G T F Q L R K S T N I Y E K A E Y D C Y V A H R T L K E P I I K K W D G E C Q D C S S G T P I G T I F G A L I G V L L V L A V I  
G G A V Y F L A N T R M G W R N A L -

>Mhc1zea<sup>3895</sup> (GenBank KC607851)

MAV F A A L F S V V M L F T V V P A W T E K H S L Y Y I Y T A L S R P V H L P G I Y E F T A M G L L D D R Q I D Y Y N S Q E Q K K I P K Q H W M K E K M Q E D Y W E  
K G T Q S R K S K E Q W F N V N L K I L M E R M R H N N S D V H V L Q W R H G C E I D S Q G N D V R F S K G I D E Y S Y D G R N F L A F D D A D S Q W V A P V E E A  
L P T K R K W D N V P I L N Q Y T K G Y L E K E C V D W L N K F R E Y G D Q E L R E G S P P D V H V F A K K I I S G K A K L K L T C M V T G F Y P K D V I L T I R K Y  
R T A L S D N E V E S S G V R P N P D G T F Q L R K S T N I Y E K A E Y D C Y V A H R T L N E P I I K K W D G E C Q D C S S G T P I G T I F G A L I G V L L V L A V I  
G G A V Y F L A N T R M G W R N A L -

>Mhc1zea<sup>3716</sup> (GenBank KC607852)

MAV F A A L F S V V M L F T V V P A W T E K H S L Y Y I Y T A L S R P V D L P G I Y Q F T A M G L L D D R Q I D Y Y N S Q E Q K K I P K Q H W M K E K M Q E D Y W E  
K G T Q S R K S K E Q W F N V N L K I L M D R M R H N N S D F H V L Q W R H G C E I D S Q D D D V R F S K G I D E Y S Y D G R N F L A F D D A E S Q W V A P V E E A  
L P T K R K W D K V P I L N Q Y T K G Y L E K E C V D W L N K F R E Y G D Q E L R E G S P P D V H V F A K K I I S G K A K L K L T C L V T G F Y P K D V Y L T I R K Y  
R T A L S D N E V E S S G V R P N P D G T F Q L R K S T N I Y E K A E Y D C Y V A H R T L K E P I I I K K W D G E C Q D C S S G T P I G T I F G A L I G V L L V L A V I  
G G A V Y F L A N T R M G W R N A L -

>Mhc1zea<sup>3674</sup> (GenBank KC607853)

MAV F A A L F S V V M L F T V V P A W T E K H S L Y Y I Y T A L S R P V N L P G I Y E F T A M G L L D D R Q I D Y Y N S Q E Q K K I P K Q H W M K E K M Q E D Y W E  
K G T Q S R K S K E Q W F N V N V G I L M D R M R H N K S D L H V L Q W R H G C E I D S Q D D D V R F S K G I D E Y S Y D G E N F L A F D D A E S R W V A P V E E A L  
P T K R K W D N V P I L N Q Y T K G Y L E K E C V D W L N K F R E Y G D Q E L R E G S P P E V H V F A K K I I S G K A K L K L T C M V T G F Y P K D V I L T I R K Y R  
T A L S D N E V E S S G V R P N P D G T F Q L R K S T N I Y E K A E Y D C Y V S H R T L K E P I I K K W D G E C Q D C S S G T P I G T I V G A L I G V L L V L A V I G  
G L V Y F L A N T R M G W R N A L -

>Mhc1zea<sup>4039</sup> (GenBank KC607854)

MAVFAALFSVVMLFTVVPWATEKHSLYIYTALSRPVHLPGIYEFIAMGLLDDRQIDYYSNQEQKKIPKQHWMKEKMQEDYWE  
KGTQSRKSKEQWFNVNLKILMDRMRHNNNSDLHVLQWRHGCEIDSQDDVRFVSKGIDEYSYDGNFLAFDDAESRWVAPVEEA  
LPTKRKWDNVDILNQYTKGYLEKECVDWLNKRFREYGDQELGEGSPDPVHVFAKKIISGKAKLKLTCMVTGFYPKDVYLTIRKY  
RTALSDNDLESSGVRPNHDGTFQLRKSTYINEKAEYDCYVSHRTLKEPIIKKWDGECQDCSSGTPIGTIFGALIGVLLVLAII  
GGAVYFLANTRMGWRNAL-

>Mhc1zfa<sup>3942</sup> (GenBank KC607855)

MIMDVKVLTLCLVFLLYGALPLCRAEKHSLYIYTGLSRPVDLPGIYEFVSAMGLLDDRQIDSYSNSREQRKIPKQQWMKEKMQE  
DYWEKGTQSRKSKEQWFNVNVHILMDRMRHNRDLHVLQWRHGCEVEIKGSEVKFSKGIDEYGYDGENFLAFDDAESQWVAPV  
EEALPTKRKWDVSPILNQYTKGYLEKECVDWLNKRFREYANEELRNGSPPEVHVFAVKSISDKTKLKLTCLATGFYSKDTMLVI  
RRNRLPEKKTTESTGVRPNHDQTFQLRKSVEIEQDETDEYDCYMTHTLTKGPVIARWDGKCKDCLPNLNWIWVAVGLMLGVV  
ALLLVLLKKKIIDLQRQLSGSQSPLYQIQADSESEDYNH-

>Mhc1zfa<sup>3686</sup> (GenBank KC607859)

MIMDVKVLTLCLVFLLYGALPLCRAEKHSLYIYTGLSRPVDLPGIYEFVSAMGLLDDRQIDSYSNSREQRKIPKQQWMKEKMQE  
DYWEKGTQSRKSKEQWFNVNVHILMERMRHNRDLHVLQWRTGCEVEIKGSEVKFSKGIDEYGYDGENFLAFDDAESQWVAPV  
EEALPTKRKWDVSPILNQYTKGYLEKECVDWLNKRFREYANEELRNGSPPEVHVFAVKSISDKTKLKLTCLATGFYSKDTMLVI  
RRNRLPEKKTTESTGVRPNHDQTFQLRKSVEIEQDETDEYDCYMTHTLTKGPVIARWDGKCKDCLPNLNWICVAVGLMLGVV  
ALLLVLLKKKIIDLQRQLSGSQSPLYQIQADSESEDYNH-

>Mhc1zfa<sup>3974</sup> (GenBank KC607862)

MIMDVKVFTSLCVLLFYGALPSCRAEKHSLYIYTGLSRPVDLPGIYEFVSAMGLLDDRQIDSYSNSREQRKIPKQQWMKEKMQE  
DYWEKGTQSRKSKELWFNVNVNIIIDRMRHNRDLHVLQWRTGCEVEIKGSEVKFSKGIDEYGYDGENFLAFDDAESQWVAPV  
EEALPTKRKWDVSPILNQYTKGYLEKECVDWLNKRFREYADEELRNGSPPEVHVFAVKSISDKTKLKLTCLATGFYSKDTMLVI  
RRNRLPEKKTTESTGVRPNHDQTFQLRKSVEIEQDETDEYDCYMTHTLTKGPVIARWDGKCKDCLPNLNWICVAVGLMLGVV  
ALLLVLLKKKIIDLQRQLSGSQSPLYQIQADSESEDYNH-

>Mhc1zfa<sup>3690</sup> (GenBank KC607864)

MIMDVKVFTLLCAFLNLGALPSCRAEKHSLYIYTGLSKPVDLPGIYEFVSAMGLLDDRQIDSYSNSREQINIPKQQWMKEKMQE  
DYWEKGTQSRKSKEQWFNVNVHILMERMRHNRSDLHVLQWRTGCEVEIKGSEVKFSKGIDEYGYDGENFLAFDDAESQWVAPV  
EEALPTKRKWDVSPILNQYTKGYLEKECVDWLNKRFREYANEELRNGSPPEVHVFAVKSISDKTKLKLTCLATGFYSKDTMLVI  
RRNRLPEKKTTESTGVRPNHDQTFQLRKSVEIEQDETDEYDCYMTHTLTKGPVIARWDGKCKDCLPNLNWICVAVGLMLGVV  
ALLPVLLKKKIIGSRQLSGSQSPLYQIQADSESEDYNH-

>Mhc1zja<sup>3692</sup> (GenBank KC607866)

MTSFDRSFTLLYLCLFHVIMSSFRAEKHSLYFIYTGLSRPVDLPGIYEFVSAMGLLDDRQIDSYNSEEQRNIPKQQWMKEKMQE  
DYWENRTQSRKEKQLWFYDNVHLLIDRNRQSTSVLHVLQWRHGCEVEKQGNESFNKSIDYGYDGEDFLYDDAESRWVAPV  
EEALPTKRKWDNLPILNQYTKDYLEKECVDWLNKRFREYADEELRKASPPDVFKLTRKSTKDETKLKLTCLATGFYPNDVMLNI  
RRYRVYLPEQETISTGVRPNHDQTFQLSKSVEIKEDQIDNYDCSVSHRTFKQPIIIKWDGTDLDGIYTGHPPETVPPVIGSVL  
IFLAILGVVFLVMKCGEQDSSSTDTTECTSILLGFIADHLNKELTEGENW-

>Mhc1zja<sup>4117</sup> (GenBank KC607867)

MTSFDRSFTLLYLCLFHVIMSSFRAEKHSLYFIYTGLSRPVDLPGIYEFVSAMGLLDDRQIDSYNSEEQRNIPKQQWMKEKMQE  
DYWENRTQSRKEKQLWFYDNVHLLIDRNRQSTSDGTDLGDIYTGHPPETVPPVIGSVLIFLAILGVVFLVMKCGEQDSSSTDT  
TTECTSILLGFIADHLNKELTEGENW-

>Mhc1zja<sup>3701</sup> (GenBank KC607868)

MTSFDRSFTLLYLCLFHVILSSFRAEKHSLYFIYTGLSRPLDLPGIYEFVSAMGLLDDRQIDSYNSEEQRNIPKQQWMKENMQE  
DYWENRTQSRKSKELWFYDNVHLLIDRNRQSTSDLHVLQWRHGCEVEKQGNESFNKSIDYGYEGKDFLSFDEAESRWVTAV  
EEALPTKRKWDVSPILNQYTKDYLEKECVDWLNKRFREYVDEEFRKASPPDVYKFTKKSTKDETKLKLTCLATGFYPNDVMLNI  
RRYRVYLPEQETISTGVRPNHDQTFQLSKSVEIKEDQIDNYDCSVSHRTFKQSIIIKWDGTDLDGKYTGYPPEPETVPPVIGSVL  
IFLAILAVVFLVMNYDAVCLPRELQKTESQKTLQNSSTTEQDSSSTDTTECTSILPGFIADHLNKELTEGENW-

>Mhc1zja<sup>3703</sup> (GenBank KC607869)

MTSFDKSFTLLYLCLFHVILSSFRAEKHSLYFIYTGLSRPLDLPGIYVFSAMGLLDDRQIDSYSNSREQRNIPKQQWMKENMQE  
DYWENRTQSRKEQQRWFYKNVHLLIDRNRQSTSDLHVLQWRHGCEVEKQGNESFNKSIDYGYEGKDFLSFDEAESRWVTAV  
EEALPTKRKWDVSPILNQYTKDYLEKECVDWLNKRFREYADEEFRKASPPDVYKFTKKSTKDETKLKLTCLATGFYPNDVMLNI  
RRYRVYLPEQETISTGVRPNHDQTFQLSKSVEIKEDQIDNYDCSVSHRTFKQSIIIKWDGTDLDGKYTGYPPEPETVPPVIGSVL  
IFLAILGVVFLVMNYDAVCLPRELQKTESQKTLQNSSTTEQDSSSTDTTDCSILPRFNANHQYKVVTKEECI-

>Mhc1zka<sup>3933</sup> (GenBank KC607870)

MMSGGVASGICALLCVFLLCGDLPSAQGEKHSLYIYTGLSKPLDLPGIYEFVSAMGLLDDRQIDSYNSEEQRKIPKQQWMKEK  
MQEDYWEKGTQSRKSKEQWFNVNVHILMDRMRHNKSDLHVLQWRHGCEVEIQGSEVKFSGVSEYGYDGENLLSFDETESQWV  
APVKEALPTKRKWDNVPILNQYTKGYLEKEECVDWLKFKREYADAELRNGSPPDVYKFTKKSTKDETKLKLTLCLATGFYPSDVM  
LNIRRNRYLPEQETISTGVRPNHDQTFQLSKSVEIKEDQIDEYDCSVSHRTFKQPIIIKWDGTDLDGKYTGYPPEVTVVIG  
SVLILLAILAVVFLVMNYDGECCGLFIHFLLKDCGLLLPCCGKTEYV-

>Mhc1zla<sup>3778</sup> (GenBank KC607871)

MAVLAVLFSAVMLLSVVPWATEKHSFYIYTALSRPVDLPGIYEFTAMGLLDDRQIDYNSIDQKKIPKQPWMKEKMQEDYWE  
KGTQSRKSKEQWFNVNVNIMDRMRHNKSDVHVLQWRHGCEIDSQGNVRFVSKGIDEYSYDGENFLAFDDAESRWVAPVEEAL  
PTKRKWDNVPILNQYTKGYLEKEECVDWLKFKREYGDQELRKVSPRDVHVFAKRYINGKDKLKLTLCLATGFYPKDVYLTIRKYR  
TALSDNDLESSGVRPNHDGTFQLRKSTYINEDEKAEYDCYVNHRTLKEPVIIRWNGECLSEPPIAMIAIGIIGVLILLGAIGVT  
VWILKKKNIIGNGDEKHFVSTVSGNKDENGFFVSTVSGNKDEKRSMPDGSADSGKSSA-

>Mhc1zla<sup>3781</sup> (GenBank KC607872)

MAVLAVLFSAVMLLSVVPWATDHVLLSFNTEKHSFYIYTALSRPVDLPGIYEFTAMGLLDDRQIDYNSIDQKKIPKQPWMK  
EKMEDYWEKGTQSRKSKEQWFNVNVNIMDRMRHNKSDVHVLQWRHGCEIDSQGNVRFVSKGIDEYSYDGENFLAFDDAESR  
WVAPVEEALPTKRKWDNVPILNQYTKGYLEKEECVDWLKFKREYGDQELRKVSPRDVHVFAKRYINGKDKLKLTLCLATGFYPKD  
VYLTIRKYRTALSDNDLESSGVRPNHDGTFQLRKSTYINEDEKAEYDCYVNHRTLKEPVIIRWNGECLSEPPIAMIAIGIIGVL  
ILLGAIGVTWILKKKNIIGNGDEKHFVSTVSGNKDENGFFVSTVSGNKDEKRSMPDGSADSGKSSA-

**Figure S1. Full-length zebrafish MHC class I Z proteins.** Proteins encoded by transcripts described in manuscript are shown. Transcript identity numbers are included as superscripts. Proteins encoded by alternatively spliced transcript variants (tv) are included. GenBank accession numbers are listed in parentheses. Non-functional transcripts are excluded from this list but are available in GenBank (KC607849, KC607856, KC607857, KC607858, KC607860, KC607861, KC607863, KC607865).

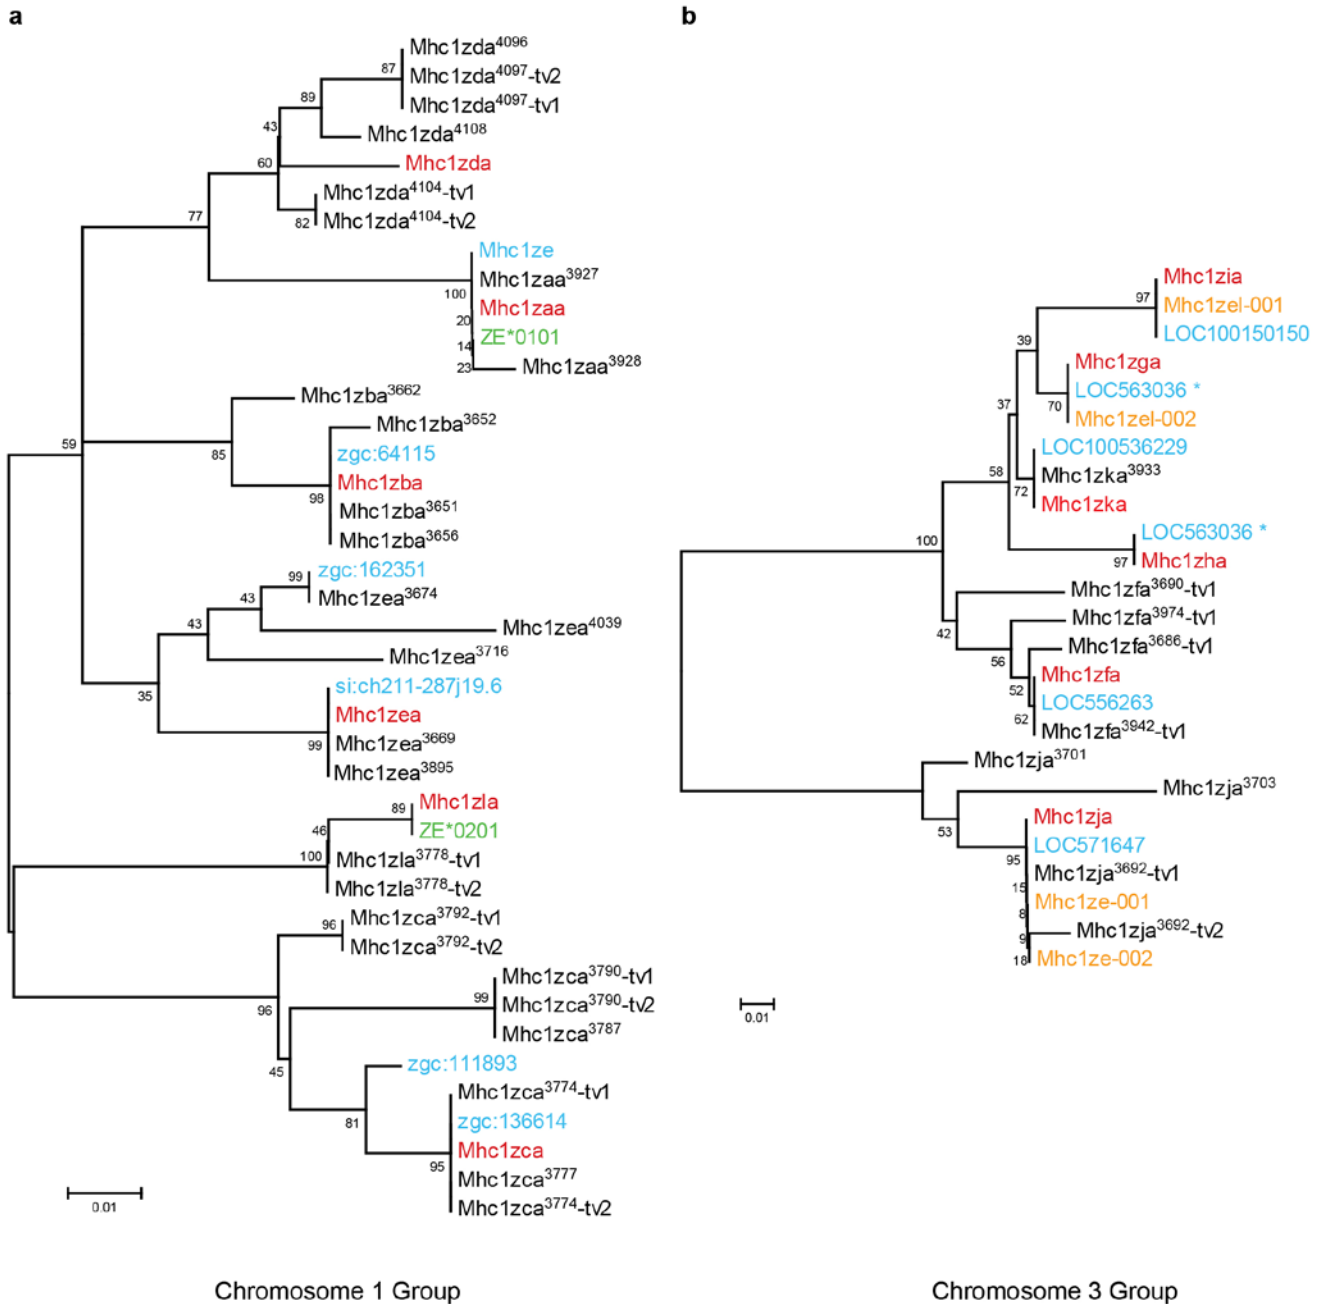

**Figure S2. Organization and classification of zebrafish Z sequences.** The  $\alpha$ 1- $\alpha$ 3 peptide domains encoded by Z sequences identified in various databases were aligned and neighbor joining trees generated. Initial analyses indicated that two distinct sequence subgroups exist that were then analyzed separately. **a** One group includes all Z sequences from chromosome 1 (Zv9). **b** The other group includes all Z sequences from chromosome 3 (Zv9). Color-coding was employed to indicate the source of the sequence as follows: red = transcripts predicted from the reference genome (Zv9), green = full-length transcripts previously described (Kruiswijk, et al. 2002. J Immunol. 169(4):1936-47), blue = sequences identified from the zebrafish reference protein database (NCBI), orange = sequences identified through ZFIN and black = full-length transcripts described in this study (transcript identity numbers are included as superscripts). \* Note that LOC563036 is a predicted transcript encoding both *Mhc1zga* and *Mhc1zha*.

|     |                                                                            |                          |                         |                         |             |
|-----|----------------------------------------------------------------------------|--------------------------|-------------------------|-------------------------|-------------|
|     | Exon 5                                                                     | Exon 6                   | Exon 7                  | Exon 8                  | Exon 9      |
| Zaa | DGKCDCS-KESAIGLIVGAIIGAVVVAIVVVAFLKKNKF-----                               | CFRTIQPSEENGR            | VLMKDFVKEENGA           | GKDPVSVVPLTNGNH         |             |
| Zba | ..E.L.GPESG.P.I.A...VVL..L.AIGG.VYFLRKES-----                              | GNNVKSPTIS               | <b>GKDEKCSMLPGSDDS</b>  | GQGSDDGSSKSSPTNSQEKMDIV |             |
| Zca | N.EYLS-----EPIA.IA...VLIIVVAIG.TWII.LKNI-----                              | GKDEKRSMPGSANY           | <b>GKGS</b>             | VRESKNKPTAAEGQSTGGDLKS  |             |
| Zda | .....VFEL.M.....F.LTVIGLVILVETRK.....                                      | APKKPFYK                 | GIGNDPFAIPIANNQHIEPS    |                         |             |
| Zea | ..E.Q...SGETP..T.F.L..VLL.L.VIGG.VYFLA-----                                | TRMGWRNAL                |                         |                         |             |
| Zfa | ...K..L-PN--LNWIWVA...LMLGV.ALLLV.I.L.KKII-----                            | DLRQLSGSQFLYIQADSESEDYNH |                         |                         |             |
| Zia | ..LMLKFAT..DEVASSST.TCAPSCTDITDGFSTGRPSTSHA-----                           | GERELRDDGHIWVQLAPPMGKN   |                         |                         |             |
| Zja | ..TDL.GIYTGHPETVPPV.GSVLIFL..LG.VVF.VMKCG-----                             | EQDSSTDTT                |                         |                         |             |
| Zka | ..TDL.GKTYGPPETVPPV.GSVLILL..LA..VF.VM.YDGECKGLFIHFTLLKDCGLLPPCGKTEYV----- | <b>GNGDEKHFVVSTIVS</b>   | <b>GKDEKENGFWVSTIVS</b> | <b>GKDEKRSMPDGSADS</b>  | <b>GKGS</b> |
| Zla | N.E.LS-----EPIAMIAG...VLIIVVAIG.TWII.LKNI-----                             |                          |                         |                         |             |

**Figure S3. Alignment of transmembrane and cytoplasmic domains.** The protein sequences from the C termini of the Z genes were aligned exon by exon. Identical residues are shown as dots while gaps are shown as dashes. The transmembrane domains are highlighted in gray and highly similar exons are highlighted in blue, green, or yellow.

**Table S1.** Zebrafish Z genes identified in the *de novo* genomic assemblies from double haploid homozygous AB (DHAB) and Tübingen (DHTu2) individuals.

| Genomic Scaffold/BAC | Gene                             | DHAB           | DHTu2 |
|----------------------|----------------------------------|----------------|-------|
| DKEY-28D10           | <i>mhc1zaa</i><br><i>mhc1zla</i> |                |       |
| Chr1, Scaffold 68    | <i>mhc1zba</i>                   | ✓              | ✓     |
|                      | <i>mhc1zca</i>                   | ✓              | ✓     |
|                      | <i>mhc1zda</i>                   | ✓ <sup>a</sup> | ✓     |
|                      | <i>mhc1zea</i>                   | ✓              | ✓     |
| Chr3, Scaffold 307   | <i>mhc1zfa</i>                   | ✓              | ✓     |
| Chr3, Scaffold 312   | <i>mhc1zga</i>                   | ✓              |       |
|                      | <i>mhc1zha</i>                   | ✓              |       |
|                      | <i>mhc1zia</i>                   | ✓              |       |
|                      | <i>mhc1zja</i>                   | ✓              |       |
| Scaffold NA257       | <i>mhc1zka</i>                   |                | ✓     |

<sup>a</sup> Only able to identify exons encoding  $\alpha 3$  to C terminus.

**Table S2.** Predicted sizes of Southern blot fragments containing Z gene  $\alpha 1$  sequences based on *HindIII* restriction sites.

| Gene                     | Genomic Location   | Predicted Size (kb) |
|--------------------------|--------------------|---------------------|
| <i>mhc1zca</i>           | Chr1, Scaffold 68  | 12.1                |
| <i>mhc1zaa</i>           | DKEY-28D10         | 11.1                |
| <i>mhc1zga + mhc1zha</i> | Chr3, Scaffold 312 | 9.2                 |
| <i>mhc1zba</i>           | Chr1, Scaffold 68  | 9.0                 |
| <i>mhc1zia</i>           | Chr3, Scaffold 312 | 7.9                 |
| <i>mhc1zja</i>           | Chr3, Scaffold 312 | 7.2                 |
| <i>mhc1zea</i>           | Chr1, Scaffold 68  | 6.6                 |
| <i>mhc1zka</i>           | Scaffold NA257     | 5.2                 |
| <i>mhc1zda</i>           | Chr1, Scaffold 68  | 4.4                 |
| <i>mhc1zfa</i>           | Chr3, Scaffold 307 | 4.3                 |
| <i>mhc1zla</i>           | DKEY-28D10         | 4.0                 |



## Mhc1zaa

|                         |     |                                                                                    |
|-------------------------|-----|------------------------------------------------------------------------------------|
| Mhc1zaa <sup>3927</sup> | 1   | MAVFAVLFSAVMLLAIVPAWTEKHSLYIYTALSRPVNLPGIHEFTAMGLLDDRQIDY YNSQEQQKIPKQPMKEKMQED    |
| Mhc1zaa <sup>3928</sup> | 1   | MAVFAVLFSAVMLLAIVPAWTEKHSLYIYTALSRPVNLPGIHEFTAMGLLDDRQIDY YNSQEQQKIPKQPMKEKMQED    |
| Mhc1zaa <sup>3927</sup> | 81  | YWEKGTQSRKSKEQWFNVNINILMERMRHNKSDVHVLQWRHGCEIESQDNNVRF SKGIIDEYSYDGENFLSFDDADSQWVA |
| Mhc1zaa <sup>3928</sup> | 81  | YWEKGTQSRKSKEQWFNVNINILMERMRHNKSDVHVLQWRHGCEIESQDNNVRF SKGIIDEYSYDGENFLSFDDADSQWVA |
| Mhc1zaa <sup>3927</sup> | 161 | PVDAALPTKRKWDNVPILNQYTKGYLEKECVDWLNKFRFYGDEELKQGSAPKVHVFAKRYVNGKAKLKLTCLATGFYPKD   |
| Mhc1zaa <sup>3928</sup> | 161 | PVDAALPTKRKWDNVPILNQYTKGYLEKECVDWLNKFRFYGDEELKQGSAPKVHVFAKRYVNGKAKLKLTCLATGFYPKD   |
| Mhc1zaa <sup>3927</sup> | 241 | VYLTIRKYRTALSDSEVESSGVRPNHDGTFQLRKSTYILEEEKAAYDCYVAHRTLNAVPVTTWDGKCSDCSKESAIGLIV   |
| Mhc1zaa <sup>3928</sup> | 241 | VYLTIRKYRTALSDSEVESSGVRPNHDGTFQLRKSTYILEEEKAAYDCYVAHRTLNAVPVTTWDGKCSDCSKESAIGLIV   |
| Mhc1zaa <sup>3927</sup> | 321 | GAIIGAVVVAIVVAVILKKNKFCFRITQEPSEENGRVLMKDPVFKEENGAGKDP SVVPLTNGNH                  |
| Mhc1zaa <sup>3928</sup> | 321 | GAIIGAVVVAIVVAVILKKNKFCFRITQEPSEENGRVLMKDPVFKEENGAGKDP SVVPLTNGNH                  |

---

## Mhc1zba

|                         |     |                                                                                   |
|-------------------------|-----|-----------------------------------------------------------------------------------|
| Mhc1zba <sup>3651</sup> | 1   | MGSFAVLFSAVMLVAVVPAWTEKHSLYIYTALSRPVNLPGIYEFTAMGLLDDRQIDY YNSEQQKIPKQHWMEKMQED    |
| Mhc1zba <sup>3652</sup> | 1   | MGSFAVLFSAVMLVAVVPAWTEKHSLYIYTALSRPVNLPGIYEFTAMGLLDDRQIDY YNSEQQKIPKQHWMEKMQED    |
| Mhc1zba <sup>3656</sup> | 1   | MGSFAVLFSAVMLVAVVPAWTEKHSLYIYTALSRPVNLPGIYEFTAMGLLDDRQIDY YNSEQQKIPKQHWMEKMQED    |
| Mhc1zba <sup>3662</sup> | 1   | MGSFAVLFSAVMLVAVVPAWTEKHSLYIYTALSRPVNLPGIYEFTAMGLLDDRQIDY YNSEQQKIPKQHWMEKMQED    |
| Mhc1zba <sup>3651</sup> | 81  | YWEKGTQSRKSKEQWFNVNINILMERMRHNKSDVHVLQWRHGCEIESQDNDVRF SRGIDEYSYDGRNFLSFDDAESQWVA |
| Mhc1zba <sup>3652</sup> | 81  | YWEKGTQSRKSKEQWFNVNINILMERMRHNKSDVHVLQWRHGCEIESQDNDVRF SRGIDEYSYDGRNFLSFDDAESQWVA |
| Mhc1zba <sup>3656</sup> | 81  | YWEKGTQSRKSKEQWFNVNINILMERMRHNKSDVHVLQWRHGCEIESQDNDVRF SRGIDEYSYDGRNFLSFDDAESQWVA |
| Mhc1zba <sup>3662</sup> | 81  | YWEKGTQSRKSKEQWFNVNINILMERMRHNKSDVHVLQWRHGCEIESQDNDVRF SRGIDEYSYDGRNFLSFDDAESQWVA |
| Mhc1zba <sup>3651</sup> | 161 | PVEEALPTKRKWDNVPILNQYTKGYLEKECVDWLNKFRFYGDKELREGSSPEVHVFAKRIINGKIKLKLTCLATGFYPKD  |
| Mhc1zba <sup>3652</sup> | 161 | PVEEALPTKRKWDNVPILNQYTKGYLEKECVDWLNKFRFYGDKELREGSSPEVHVFAKRIINGKIKLKLTCLATGFYPKD  |
| Mhc1zba <sup>3656</sup> | 161 | PVEEALPTKRKWDNVPILNQYTKGYLEKECVDWLNKFRFYGDKELREGSSPEVHVFAKRIINGKIKLKLTCLATGFYPKD  |
| Mhc1zba <sup>3662</sup> | 161 | PVEEALPTKRKWDNVPILNQYTKGYLEKECVDWLNKFRFYGDKELREGSSPEVHVFAKRIINGKIKLKLTCLATGFYPKD  |
| Mhc1zba <sup>3651</sup> | 241 | VILNIRKYRITLDPNEVESTGVRPNEDGTFQLRKSINIYEDEKAAYDCYVSHITLKEPIIKKWDGCELDGPESGSPIGII  |
| Mhc1zba <sup>3652</sup> | 241 | VILNIRKYRITLDPNEVESTGVRPNEDGTFQLRKSINIYEDEKAAYDCYVSHITLKEPIIKKWDGCELDGPESGSPIGII  |
| Mhc1zba <sup>3656</sup> | 241 | VILNIRKYRITLDPNEVESTGVRPNEDGTFQLRKSINIYEDEKAAYDCYVSHITLKEPIIKKWDGCELDGPESGSPIGII  |
| Mhc1zba <sup>3662</sup> | 241 | VILNIRKYRITLDPNEVESTGVRPNEDGTFQLRKSINIYEDEKAAYDCYVSHITLKEPIIKKWDGCELDGPESGSPIGII  |
| Mhc1zba <sup>3651</sup> | 321 | AGAIIVLVVLA AIGGAVYFLRKRSGNNVVKPSSVPTISGNKDEKCSMLPGSDDSGQSSDGS SKSSPTNSQEKMDIV    |
| Mhc1zba <sup>3652</sup> | 321 | AGAIIVLVVLA AIGGAVYFLRKRSGNNVVKPSSVPTISGNKDEKCSMLPGSDDSGQSSDGS SKSSPTNSQEKMDIV    |
| Mhc1zba <sup>3656</sup> | 321 | AGAIIVLVVLA AIGGAVYFLRKRSGNNVVKPSSVPTISGNKDEKCSMLPGSDDSGQSSDGS SKSSPTNSQEKMDIV    |
| Mhc1zba <sup>3662</sup> | 321 | AGAIIVLVVLA AIGGAVYFLRKRSGNNVVKPSSVPTISGNKDEKCSMLPGSDDSGQSSDGS SKSSPTNSQEKMDIV    |

# Mhc1zca

Mhc1zca<sup>3774</sup> 1 MAVLAVLFSAVMLLSVVSVRTEKHSLYIYTALSRPVDQSGIYQFTAMGLLDDRQIDYNNIDQKKIPKQHWMEKMQED  
Mhc1zca<sup>3777</sup> 1 MAVLAVLFSAVMLLSVVSVRTEKHSLYIYTALSRPVDQSGIYQFTAMGLLDDRQIDYNNIDQKKIPKQHWMEKMQED  
Mhc1zca<sup>3790</sup> 1 MAVLAVLFSAVMLLFVVPAPWTEKHSLYIYTALSRPVDQSGIYQFTAMGLLDDRQIDYNNIDQKKIPKQHWMEKMQED  
Mhc1zca<sup>3787</sup> 1 MAVLAVLFSAVMLLFVVPAPWTEKHSLYIYTALSRPVDQSGIYQFTAMGLLDDRQIDYNNIDQKKIPKQHWMEKMQED  
Mhc1zca<sup>3792</sup> 1 MAVLAVLFSAVMLLFVVPAPWTEKHSLYIYTALSRPVDQSGIYQFTAMGLLDDRQIDYNNIDQKKIPKQHWMEKMQED  
Mhc1zca<sup>3919</sup> 1 MAVLAVLFSAVMLLSVVSVRTEKHSLYIYTALSRPVDQSGIYQFTAMGLLDDRQIDYNNIDQKKIPKQHWMEKMQED  
Mhc1zca<sup>3788</sup> 1 MAVLAVLFSAVMLLFVVPAPWTEKHSLYIYTALSRPVDQSGIYQFTAMGLLDDRQIDYNNIDQKKIPKQHWMEKMQED  
Mhc1zca<sup>3794</sup> 1 MAVLAVLFSAVMLLFVVPAPWTEKHSLYIYTALSRPVDQSGIYQFTAMGLLDDRQIDYNNIDQKKIPKQHWMEKMQED

Mhc1zca<sup>3774</sup> 81 YWEKGTQSRKSKEQWFNVNVLMDRMRHNNSDLHVLQWRHGCEIEIQGNEHRFSKGIDEYSYDGRNFLSFDDAESQWVA  
Mhc1zca<sup>3777</sup> 81 YWEKGTQSRKSKEQWFNVNVLMDRMRHNNSDLHVLQWRHGCEIEIQGNEHRFSKGIDEYSYDGRNFLSFDDAESQWVA  
Mhc1zca<sup>3790</sup> 81 YWEKGTQSRKSKEQWFNVNVLMDRMRHNNSDLHVLQWRHGCEIEIQGNEHRFSKGIDEYSYDGRNFLSFDDAESQWVA  
Mhc1zca<sup>3787</sup> 81 YWEKGTQSRKSKEQWFNVNVLMDRMRHNNSDLHVLQWRHGCEIEIQGNEHRFSKGIDEYSYDGRNFLSFDDAESQWVA  
Mhc1zca<sup>3792</sup> 81 YWEKGTQSRKSKEQWFNVNVLMDRMRHNNSDLHVLQWRHGCEIEIQGNEHRFSKGIDEYSYDGRNFLSFDDAESQWVA  
Mhc1zca<sup>3919</sup> 81 YWEKGTQSRKSKEQWFNVNVLMDRMRHNNSDLHVLQWRHGCEIEIQGNEHRFSKGIDEYSYDGRNFLSFDDAESQWVA  
Mhc1zca<sup>3788</sup> 81 YWEKGTQSRKSKEQWFNVNVLMDRMRHNNSDLHVLQWRHGCEIEIQGNEHRFSKGIDEYSYDGRNFLSFDDAESQWVA  
Mhc1zca<sup>3794</sup> 81 YWEKGTQSRKSKEQWFNVNVLMDRMRHNNSDLHVLQWRHGCEIEIQGNEHRFSKGIDEYSYDGRNFLSFDDAESQWVA

Mhc1zca<sup>3774</sup> 161 PVDAALPTKRKWDNVPILNQYTKGYLEKECVDWLNKFRYEGDQELRDGSPDVFVVFARRIISGKIKLKLTCMATGFYPKD  
Mhc1zca<sup>3777</sup> 161 PVDAALPTKRKWDNVPILNQYTKGYLEKECVDWLNKFRYEGDQELRDGSPDVFVVFARRIISGKIKLKLTCMATGFYPKD  
Mhc1zca<sup>3790</sup> 161 PVDAALPTKRKWDNVPILNQYTKGYLEKECVDWLNKFRYEGDQELRDGSPDVFVVFARRIISGKIKLKLTCMATGFYPKD  
Mhc1zca<sup>3787</sup> 161 PVDAALPTKRKWDNVPILNQYTKGYLEKECVDWLNKFRYEGDQELRDGSPDVFVVFARRIISGKIKLKLTCMATGFYPKD  
Mhc1zca<sup>3792</sup> 161 PVDAALPTKRKWDNVPILNQYTKGYLEKECVDWLNKFRYEGDQELRDGSPDVFVVFARRIISGKIKLKLTCMATGFYPKD  
Mhc1zca<sup>3919</sup> 161 PVDAALPTKRKWDNVPILNQYTKGYLEKECVDWLNKFRYEGDQELRDG-----  
Mhc1zca<sup>3788</sup> 161 PVDAALPTKRKWDNVPILNQYTKGYLEKECVDWLNKFRYEGDQELRDGSPDVFVVFARRIISGKIKLKLTCMATGFYPKD  
Mhc1zca<sup>3794</sup> 161 PVDAALPTKRKWDNVPILNQYTKGYLEKECVDWLNKFRYEGDQELRDG-----

Mhc1zca<sup>3774</sup> 241 MILTIRKYRMTLDPDNDLSSGVRPNQDGTFLRKSNTIYDEDEKAAYDCYVNHRTLKEPIIVRWNGEYLSEPPIAIIAII  
Mhc1zca<sup>3777</sup> 241 MILTIRKYRMTLDPDNDLSSGVRPNQDGTFLRKSNTIYDEDEKVEYDCYVNHRTLKEPIIVRWNGEYLSEPPIAIIAII  
Mhc1zca<sup>3790</sup> 241 MILTIRKYRMTLDPDNDLSSGVRPNQDGTFLRKSNTIYDEDEKAAYDCYVNHRTLKEPIIVRWYGEYLSEPPIAIIAII  
Mhc1zca<sup>3787</sup> 241 MILTIRKYRMTLDPDNDLSSGVRPNQDGTFLRKSNTIYDEDEKAAYDCYVNHRTLKEPIIVRWYGEYLSEPPIAIIAII  
Mhc1zca<sup>3792</sup> 241 MILTIRKYRMTLDPDNDLSSGVRPNQDGTFLRKSNTIYDEDEKAAYDCYVNHRTLKEPIIVRWYGEYLSEPPIAIIAII  
Mhc1zca<sup>3919</sup> 209 -----YGEYLSEPPIAIIAII  
Mhc1zca<sup>3788</sup> 241 MILTIRKYRMTLDPDNDLSSGVRPNQDGTFLRKSNTIYDEDEKAAYDCYVNHRTLKEPIIVRWYGEYLSEPPIAIIAII  
Mhc1zca<sup>3794</sup> 209 -----YGEYLSEPPIAIIAII

Mhc1zca<sup>3774</sup> 321 GVLILLVAIGVTWVILKKKNIIGNKDEKRSMPNGSANYGRGSSA  
Mhc1zca<sup>3777</sup> 321 GVLILLVAIGVTWVILKKKNIIGNKDEKRSMPNGSANYGRGSSA  
Mhc1zca<sup>3790</sup> 321 GVLILLVAIGVTWVILKKKNIIGNKDEKRSMPNGSANYGIGSCA  
Mhc1zca<sup>3787</sup> 321 GVLILLVAIGVTWVILKKKNIIGNKDEKRSMPNGSANYGIGSCA  
Mhc1zca<sup>3792</sup> 321 GVLILLVAIGVTWVILKKKNIIGNKDEKRSMPNGSANYGIGSCA  
Mhc1zca<sup>3919</sup> 226 GVLILLVAIGVTWVILKKKNIIGNKDEKRSMPNGSANYGRGSSA  
Mhc1zca<sup>3788</sup> 321 QN-----  
Mhc1zca<sup>3794</sup> 226 GVLILLVAIGVTWVILKKKNIIGNKDEKRSMPNGSANYGIGSCA

## Mhc1zda

Mhc1zda<sup>4104</sup> 1 MAVFVLLAVMLLDVEPATTEKHSLYIYTALSRPVNLPGIYEFTAMGLDDRQIDYNSQEKKIPKQHWMEKMQED  
Mhc1zda<sup>4097</sup> 1 MAVFVLLAVMLLDVEPATTEKHSLYIYTALSRPVDLPGIYEFTAMGLDDRQIDYNSQEKKIPKQHWMEKMQED  
Mhc1zda<sup>4108</sup> 1 MAVFVLLAVMLLDVEPATTEKHSLYIYTALSRPVDLPGIYEFTAMGLDDRQIDYNSQEKKIPKQHWMEKMQED  
Mhc1zda<sup>4113</sup> 1 MAVFVLLAVMLLDVEPATTEKHSLYIYTALSRPVNLPGIYEFTAMGLDDRQIDYNSQEKKIPKQHWMEKMQED  
Mhc1zda<sup>4098</sup> 1 MAVFVLLAVMLLDVEPATTEKHSLYIYTALSRPVDLPGIYEFTAMGLDDRQIDYNSQEKKIPKQHWMEKMQED  
Mhc1zda<sup>4096</sup> 1 MAVFVLLAVMLLDVEPATTEKHSLYIYTALSRPVDLPGIYEFTAMGLDDRQIDYNSQEKKIPKQHWMEKMQED

Mhc1zda<sup>4104</sup> 81 YWKEGTQSRKSKEQWFNVNVLMDRMRHNKSDVHVLQWRHGCEIDSQDDVRFSGIDEYSYDGENFLSFDDADSQVVA  
Mhc1zda<sup>4097</sup> 81 YWKEGTQSRKSKEQWFNVNVLMDRMRHNKSDVHVLQWRHGCEIDSQDDVRFSGIDEYSYDGENFLSFDDADSQVVA  
Mhc1zda<sup>4108</sup> 81 YWKEGTQSRKSKEQWFNVNVLMDRMRHNKSDVHVLQWRHGCEIDSQDDVRFSGIDEYSYDGENFLSFDDADSQVVA  
Mhc1zda<sup>4113</sup> 81 YWKEGTQSRKSKEQWFNVNVLMDRMRHNKSDVHVLQWRHGCEIDSQDDVRFSGIDEYSYDGENFLSFDDADSQVVA  
Mhc1zda<sup>4098</sup> 81 YWKEGTQSRKSKEQWFNVNVLMDRMRHNKSDVHVLQWRHGCEIDSQDDVRFSGIDEYSYDGENFLSFDDADSQVVA  
Mhc1zda<sup>4096</sup> 81 YWKEGTQSRKSKEQWFNVNVLMDRMRHNKSDVHVLQWRHGCEIDSQDDVRFSGIDEYSYDGENFLSFDDADSQVVA

Mhc1zda<sup>4104</sup> 161 PVDAALPTKRKWDNVPILNQYTKGYLEKECVDWLNKFRREYDEEELREGSPPDVHVVFARSIINGKAKLKLTCLATGFYPKD  
Mhc1zda<sup>4097</sup> 161 PVDAALPTKRKWDNVPILNQYTKGYLEKECVDWLNKFRREYDEEELREGSPPDVHVVFARSIINGKAKLKLTCLATGFYPKD  
Mhc1zda<sup>4108</sup> 161 PVDAALPTKRKWDNVPILNQYTKGYLEKECVDWLNKFRREYDEEELREGSPPDVHVVFARSIINGKAKLKLTCLATGFYPKD  
Mhc1zda<sup>4113</sup> 161 PVDAALPTKRKWDNVPILNQYTKGYLEKECVDWLNKFRREYDEEELREGSPPDVHVVFARSIINGKAKLKLTCLATGFYPKD  
Mhc1zda<sup>4098</sup> 161 PVDAALPTKRKWDNVPILNQYTKGYLEKECVDWLNKFRREYDEEELREGSPPDVHVVFARSIINGKAKLKLTCLATGFYPKD  
Mhc1zda<sup>4096</sup> 161 PVDAALPTKRKWDNVPILNQYTKGYLEKECVDWLNKFRREYDEEELREGSPPDVHVVFARSIINGKAKLKLTCLATGFYPKD

Mhc1zda<sup>4104</sup> 241 VYLTIRKYRMALSDKDLESSGVRPNHDGTFQLRKSTYIYEDEKAAYDCYVKHRTLGAPEIIKKWDGKCSDCSKVTFLGMIV  
Mhc1zda<sup>4097</sup> 241 VYLTIRKYRMALSDKDLESSGVRPNHDGTFQLRKSTYIYEDEKAAYDCYVKHRTLGAPEIIKKWDGKCSDCSKVTFLGMIV  
Mhc1zda<sup>4108</sup> 241 VYLTIRKYRMALSDKDLESSGVRPNHDGTFQLRKSTYIYEDEKAAYDCYVKHRTLGAPEIIKKWDGKCSDCSKVTFLGMIV  
Mhc1zda<sup>4113</sup> 241 VYLTIRKYRMALSDKDLESSGVRPNHDGTFQLRKSTYIYEDEKAAYDCYVKHRTLGAPEIIKKWDGKCSDCSKVTFLGMIV  
Mhc1zda<sup>4098</sup> 241 VYLTIRKYRMALSDKDLESSGVRPNHDGTFQLRKSTYIYEDEKAAYDCYVKHRTLGAPEIIKKWDGKCSDCSKVTFLGMIV  
Mhc1zda<sup>4096</sup> 241 VYLTIRKYRMALSDKDLESSGVRPNHDGTFQLRKSTYIYEDEKAAYDCYVKHRTLGAPEIIKKWDGKCSDCSKVTFLGMIV

Mhc1zda<sup>4104</sup> 321 GAIIGAVLVLTIVIGLVILVLTIRKKAAPKPPFYKNGIGDNDPSAIPLNQNHIEPSVKESKNKPTAAEGQSTSGDLKS  
Mhc1zda<sup>4097</sup> 321 GAIIGAVLVLTIVIGLVILVLTIRKKAAPKPPFYKNGIGDNDPSAIPLNQNHIEPSVKESKNKPTAAEGQSTSGDLKS  
Mhc1zda<sup>4108</sup> 321 GAIIGAVLVLTIVIGLVILVLTIRKKAAPKPPFYKNGIGDNDPSAIPLNQNHIEPSVKESKNKPTAAEGQSTSGDLKS  
Mhc1zda<sup>4113</sup> 321 GAIIGAVLVLTIVIGLVILVLTIRKKAAPKPPFYKNGIGDNDPSAIPLNQNHIEPSVKESKNKPTAAEGQSTSGDLKS  
Mhc1zda<sup>4098</sup> 321 GAIIGAVLVLTIVIGLVILVLTIRKKAAPKPPFYKNGIGDNDPSAIPLNQNHIEPSVKESKNKPTAAEGQSTSGDLKS  
Mhc1zda<sup>4096</sup> 321 GAIIGAVLVLTIVIGLVILVLTIRKKAAPKPPFYKNGIGDNDPSAIPLNQNHIEPSVKESKNKPTAAEGQSTSGDLKS

## Mhc1zea

Mhc1zea<sup>3669</sup> 1 MAVFAALF SVVMLFTVVP AWTEKHSLYIYTALSRPVHLPGIYEFTAMGLLDDRQIDYNSQEQQKIPKQHWMEKMQED  
Mhc1zea<sup>3895</sup> 1 MAVFAALF SVVMLFTVVP AWTEKHSLYIYTALSRPVHLPGIYEFTAMGLLDDRQIDYNSQEQQKIPKQHWMEKMQED  
Mhc1zea<sup>3716</sup> 1 MAVFAALF SVVMLFTVVP AWTEKHSLYIYTALSRPVHLPGIYEFTAMGLLDDRQIDYNSQEQQKIPKQHWMEKMQED  
Mhc1zea<sup>3674</sup> 1 MAVFAALF SVVMLFTVVP AWTEKHSLYIYTALSRPVHLPGIYEFTAMGLLDDRQIDYNSQEQQKIPKQHWMEKMQED  
Mhc1zea<sup>4039</sup> 1 MAVFAALF SVVMLFTVVP AWTEKHSLYIYTALSRPVHLPGIYEFTAMGLLDDRQIDYNSQEQQKIPKQHWMEKMQED

Mhc1zea<sup>3669</sup> 81 YWKEGTQSRKSKEQWFNVNLIKILMRMRHNNNSDHLVLRHRCGEIDSQGN DVRFSGKIDEYSYDGRNFLAFDDA DSQWV  
Mhc1zea<sup>3895</sup> 81 YWKEGTQSRKSKEQWFNVNLIKILMRMRHNNNSDHLVLRHRCGEIDSQGN DVRFSGKIDEYSYDGRNFLAFDDA DSQWV  
Mhc1zea<sup>3716</sup> 81 YWKEGTQSRKSKEQWFNVNLIKILMRMRHNNNSDHLVLRHRCGEIDSQGN DVRFSGKIDEYSYDGRNFLAFDDA DSQWV  
Mhc1zea<sup>3674</sup> 81 YWKEGTQSRKSKEQWFNVNLIKILMRMRHNNNSDHLVLRHRCGEIDSQGN DVRFSGKIDEYSYDGRNFLAFDDA DSQWV  
Mhc1zea<sup>4039</sup> 81 YWKEGTQSRKSKEQWFNVNLIKILMRMRHNNNSDHLVLRHRCGEIDSQGN DVRFSGKIDEYSYDGRNFLAFDDA DSQWV

Mhc1zea<sup>3669</sup> 161 APVEEALP TKRKWDNVP ILNQYTKGYLEKECVDWLNKFRYGDQELREGSPPDVHVFAKKIISGKAKLKLTCMVTGFYPK  
Mhc1zea<sup>3895</sup> 161 APVEEALP TKRKWDNVP ILNQYTKGYLEKECVDWLNKFRYGDQELREGSPPDVHVFAKKIISGKAKLKLTCMVTGFYPK  
Mhc1zea<sup>3716</sup> 161 APVEEALP TKRKWDNVP ILNQYTKGYLEKECVDWLNKFRYGDQELREGSPPDVHVFAKKIISGKAKLKLTCMVTGFYPK  
Mhc1zea<sup>3674</sup> 160 APVEEALP TKRKWDNVP ILNQYTKGYLEKECVDWLNKFRYGDQELREGSPPDVHVFAKKIISGKAKLKLTCMVTGFYPK  
Mhc1zea<sup>4039</sup> 161 APVEEALP TKRKWDNVP ILNQYTKGYLEKECVDWLNKFRYGDQELREGSPPDVHVFAKKIISGKAKLKLTCMVTGFYPK

Mhc1zea<sup>3669</sup> 241 DVILTIKRYRTALSDNEVESSGVRPNPDGTFQLRKSTNIYEKAEYDCYVAHRTLKEPIIKKWDGECQDCSSGTPIGTIFG  
Mhc1zea<sup>3895</sup> 241 DVILTIKRYRTALSDNEVESSGVRPNPDGTFQLRKSTNIYEKAEYDCYVAHRTLKEPIIKKWDGECQDCSSGTPIGTIFG  
Mhc1zea<sup>3716</sup> 241 DVILTIKRYRTALSDNEVESSGVRPNPDGTFQLRKSTNIYEKAEYDCYVAHRTLKEPIIKKWDGECQDCSSGTPIGTIFG  
Mhc1zea<sup>3674</sup> 240 DVILTIKRYRTALSDNEVESSGVRPNPDGTFQLRKSTNIYEKAEYDCYVSHRTLKEPIIKKWDGECQDCSSGTPIGTIFG  
Mhc1zea<sup>4039</sup> 241 DVILTIKRYRTALSDNEVESSGVRPNPDGTFQLRKSTNIYEKAEYDCYVSHRTLKEPIIKKWDGECQDCSSGTPIGTIFG

Mhc1zea<sup>3669</sup> 321 ALIGVLLVLA VIGGAVYFLANTRMGWRNAL  
Mhc1zea<sup>3895</sup> 321 ALIGVLLVLA VIGGAVYFLANTRMGWRNAL  
Mhc1zea<sup>3716</sup> 321 ALIGVLLVLA VIGGAVYFLANTRMGWRNAL  
Mhc1zea<sup>3674</sup> 320 ALIGVLLVLA VIGGAVYFLANTRMGWRNAL  
Mhc1zea<sup>4039</sup> 321 ALIGVLLVLA VIGGAVYFLANTRMGWRNAL

## Mhc1zfa

Mhc1zfa<sup>3942</sup> 1 MIMDVKVTLLCVLFLY GALPL CRAEKHSLYIYTGLSRPVDLPGIYEF SAMGLLDDRQIDS YNSREQRKIPKQOWMKEK  
Mhc1zfa<sup>3686</sup> 1 MIMDVKVTLLCVLFLY GALPL CRAEKHSLYIYTGLSRPVDLPGIYEF SAMGLLDDRQIDS YNSREQRKIPKQOWMKEK  
Mhc1zfa<sup>3974</sup> 1 MIMDVKVTLLCVLFLY GALPL CRAEKHSLYIYTGLSRPVDLPGIYEF SAMGLLDDRQIDS YNSREQRKIPKQOWMKEK  
Mhc1zfa<sup>3690</sup> 1 MIMDVKVTLLCVLFLY GALPL CRAEKHSLYIYTGLSRPVDLPGIYEF SAMGLLDDRQIDS YNSREQRKIPKQOWMKEK

Mhc1zfa<sup>3942</sup> 81 MQEDYWEKGTQSRKSKEQWFNVNVIILMRMRHNRDLHLVLRHRCGEVEIKGSEVKFSGKIDEYGYDGENFLAFDDAES  
Mhc1zfa<sup>3686</sup> 81 MQEDYWEKGTQSRKSKEQWFNVNVIILMRMRHNRDLHLVLRHRCGEVEIKGSEVKFSGKIDEYGYDGENFLAFDDAES  
Mhc1zfa<sup>3974</sup> 81 MQEDYWEKGTQSRKSKEQWFNVNVIILMRMRHNRDLHLVLRHRCGEVEIKGSEVKFSGKIDEYGYDGENFLAFDDAES  
Mhc1zfa<sup>3690</sup> 81 MQEDYWEKGTQSRKSKEQWFNVNVIILMRMRHNRDLHLVLRHRCGEVEIKGSEVKFSGKIDEYGYDGENFLAFDDAES

Mhc1zfa<sup>3942</sup> 161 QWVAPVEEALP TKRKWDSVP ILNQYTKGYLEKECVDWLNKFRYANEELRNGSPPEVHVFAVKSISDKTKLKLTCLATGF  
Mhc1zfa<sup>3686</sup> 161 QWVAPVEEALP TKRKWDSVP ILNQYTKGYLEKECVDWLNKFRYANEELRNGSPPEVHVFAVKSISDKTKLKLTCLATGF  
Mhc1zfa<sup>3974</sup> 161 QWVAPVEEALP TKRKWDSVP ILNQYTKGYLEKECVDWLNKFRYANEELRNGSPPEVHVFAVKSISDKTKLKLTCLATGF  
Mhc1zfa<sup>3690</sup> 161 QWVAPVEEALP TKRKWDSVP ILNQYTKGYLEKECVDWLNKFRYANEELRNGSPPEVHVFAVKSISDKTKLKLTCLATGF

Mhc1zfa<sup>3942</sup> 241 YSKDTMLVIRRNRLEPKKTESTGVRPNHDQTFQLRKSV EIEQDETDEYDCYMT HRTLKGPVIARWDGKCKDCLPNLNWIC  
Mhc1zfa<sup>3686</sup> 241 YSKDTMLVIRRNRLEPKKTESTGVRPNHDQTFQLRKSV EIEQDETDEYDCYMT HRTLKGPVIARWDGKCKDCLPNLNWIC  
Mhc1zfa<sup>3974</sup> 241 YSKDTMLVIRRNRLEPKKTESTGVRPNHDQTFQLRKSV EIEQDETDEYDCYMT HRTLKGPVIARWDGKCKDCLPNLNWIC  
Mhc1zfa<sup>3690</sup> 241 YSKDTMLVIRRNRLEPKKTESTGVRPNHDQTFQLRKSV EIEQDETDEYDCYMT HRTLKGPVIARWDGKCKDCLPNLNWIC

Mhc1zfa<sup>3942</sup> 321 VVAGAVMLG VVALLVLLKKKIIDLQR LSGS QSPYQIQADSESEDYNH  
Mhc1zfa<sup>3686</sup> 321 VVAGAVMLG VVALLVLLKKKIIDLQR LSGS QSPYQIQADSESEDYNH  
Mhc1zfa<sup>3974</sup> 321 VVAGAVMLG VVALLVLLKKKIIDLQR LSGS QSPYQIQADSESEDYNH  
Mhc1zfa<sup>3690</sup> 321 VVAGAVMLG VVALLVLLKKKIIDLQR LSGS QSPYQIQADSESEDYNH

## Mhc1zja

|                         |     |                                                                                       |
|-------------------------|-----|---------------------------------------------------------------------------------------|
| Mhc1zja <sup>3692</sup> | 1   | MTSFDRSFTLLYLCLFHVIMSSFRAEKHSLYFIYTGLSRPVDLPGIYEFVSAMGLLDDRQIDSYNSEEQRNIPKQQWMKEK     |
| Mhc1zja <sup>4117</sup> | 1   | MTSFDRSFTLLYLCLFHVIMSSFRAEKHSLYFIYTGLSRPVDLPGIYEFVSAMGLLDDRQIDSYNSEEQRNIPKQQWMKEK     |
| Mhc1zja <sup>3701</sup> | 1   | MTSFDRSFTLLYLCLFHVIMSSFRAEKHSLYFIYTGLSRPVDLPGIYEFVSAMGLLDDRQIDSYNSEEQRNIPKQQWMKEN     |
| Mhc1zja <sup>3703</sup> | 1   | MTSFDRSFTLLYLCLFHVIMSSFRAEKHSLYFIYTGLSRPVDLPGIYEFVSAMGLLDDRQIDSYNSREQRNIPKQQWMKEN     |
|                         |     |                                                                                       |
| Mhc1zja <sup>3692</sup> | 81  | MQEDYWENRTQSRKEKQLWFYDNVHLLIDRNRQSTSVLHVLQWRHGCEVEKQGNEHSFNKSIDYGYIGEDFLMYDPAES       |
| Mhc1zja <sup>4117</sup> | 81  | MQEDYWENRTQSRKEKQLWFYDNVHLLIDRNRQSTSVLHVLQWRHGCEVEKQGNEHSFNKSIDYGYIGEDFLMYDPAES       |
| Mhc1zja <sup>3701</sup> | 81  | MQEDYWENRTQSRKSKELWFYDNVHLLIDRNRQSTSDLHVLQWRHGCEVEKQGNEHSFNKSIDYGYEGKDFLSFDEAES       |
| Mhc1zja <sup>3703</sup> | 81  | MQEDYWENRTQSRKEKQLWFYDNVHLLIDRNRQSTSDLHVLQWRHGCEVEKQGNEHSFNKSIDYGYEGKDFLSFDEAES       |
|                         |     |                                                                                       |
| Mhc1zja <sup>3692</sup> | 161 | RWVTAVEEALPTKRKWDNVPILNQYTKDYLEKECVDWLNKRFREYADEEFRKASPPDVYKFTTKSTKDETKLKLTLCLATGF    |
| Mhc1zja <sup>4117</sup> | 116 | -----                                                                                 |
| Mhc1zja <sup>3701</sup> | 161 | RWVTAVEEALPTKRKWDSVPILNQYTKDYLEKECVDWLNKRFREYVDEEFRKASPPDVYKFTTKSTKDETKLKLTLCLATGF    |
| Mhc1zja <sup>3703</sup> | 161 | RWVTAVEEALPTKRKWDSVPILNQYTKDYLEKECVDWLNKRFREYADEEFRKASPPDVYKFTTKSTKDETKLKLTLCLATGF    |
|                         |     |                                                                                       |
| Mhc1zja <sup>3692</sup> | 241 | YPNDVMLNIRRYRVYLPEQETISTGVRPNHDQTFQLSKSVEIKEDQIDNYDCSVSHRTFKQSI I I I KWDGTDLDGIYTGHP |
| Mhc1zja <sup>4117</sup> | 116 | -----SDGTDLDGIYTGHP                                                                   |
| Mhc1zja <sup>3701</sup> | 241 | YPNDVMLNIRRYRVYLPEQETISTGVRPNHDQTFQLSKSVEIKEDQIDNYDCSVSHRTFKQSI I I I KWDGTDLDGKYTGYP |
| Mhc1zja <sup>3703</sup> | 241 | YPNDVMLNIRRYRVYLPEQETISTGVRPNHDQTFQLSKSVEIKEDQIDNYDCSVSHRTFKQSI I I I KWDGTDLDGKYTGYP |
|                         |     |                                                                                       |
| Mhc1zja <sup>3692</sup> | 321 | PETVPVIGSVLIFLAILGVVFLVMKCG-----EQDSSSDTTECTSIILPGFIADHLNKE                           |
| Mhc1zja <sup>4117</sup> | 130 | PETVPVIGSVLIFLAILGVVFLVMKCG-----EQDSSSDTTECTSIILPGFIADHLNKE                           |
| Mhc1zja <sup>3701</sup> | 321 | PETVPVIGSVLIFLAILVVVFLVMNYDAVCLPRELQKTESQKTLQNSSTTEQDSSSDTTECTSIILPGFIADHLNKE         |
| Mhc1zja <sup>3703</sup> | 321 | PETVPVIGSVLIFLAILGVVFLVMNYDAVCLPRELQKTESQKTLQNSSTTEQDSSSDTTECTSIILPRENANHQYKVP        |
|                         |     |                                                                                       |
| Mhc1zja <sup>3692</sup> | 377 | LTEGENW                                                                               |
| Mhc1zja <sup>4117</sup> | 186 | LTEGENW                                                                               |
| Mhc1zja <sup>3701</sup> | 401 | LTEGENW                                                                               |
| Mhc1zja <sup>3703</sup> | 401 | LVKKECI                                                                               |

## Mhc1zla

|                         |     |                                                                                   |
|-------------------------|-----|-----------------------------------------------------------------------------------|
| Mhc1zla <sup>3778</sup> | 1   | MAVLAVLFSAVMLLSVVPAWT-----EKHSFLFYIYTALSRPVDLPGIYEFTAMGLLDDRQIDYVNSIDQKKIPKQP     |
| Mhc1zla <sup>3781</sup> | 1   | MAVLAVLFSAVMLLSVVPAWTDHVLLSFNTEKHSFLFYIYTALSRPVDLPGIYEFTAMGLLDDRQIDYVNSIDQKKIPKQP |
|                         |     |                                                                                   |
| Mhc1zla <sup>3778</sup> | 72  | WMKEKMQEDYWEKGTQSRKSKEQWFNVNVIILMDRMRHNKSDVHVLQWRHGCEIDSQGNVRFVSKGIDEYSYDGENFLAF  |
| Mhc1zla <sup>3781</sup> | 81  | WMKEKMQEDYWEKGTQSRKSKEQWFNVNVIILMDRMRHNKSDVHVLQWRHGCEIDSQGNVRFVSKGIDEYSYDGENFLAF  |
|                         |     |                                                                                   |
| Mhc1zla <sup>3778</sup> | 152 | DDAESRWVAVEEALPTKRKWDNVPILNQYTKGYLEKECVDWLNKRFREYGDQELRKVSPRDVHVFAKRYINGKDKLKLTC  |
| Mhc1zla <sup>3781</sup> | 161 | DDAESRWVAVEEALPTKRKWDNVPILNQYTKGYLEKECVDWLNKRFREYGDQELRKVSPRDVHVFAKRYINGKDKLKLTC  |
|                         |     |                                                                                   |
| Mhc1zla <sup>3778</sup> | 232 | LATGFYPKDVYLTIRKYRTALSDNDLESSGVRPNHDGTFQLRKSTYINEDEKAEDCYVNHRTLKEPVIIRWNGECLSEP   |
| Mhc1zla <sup>3781</sup> | 241 | LATGFYPKDVYLTIRKYRTALSDNDLESSGVRPNHDGTFQLRKSTYINEDEKAEDCYVNHRTLKEPVIIRWNGECLSEP   |
|                         |     |                                                                                   |
| Mhc1zla <sup>3778</sup> | 312 | PIAMIAGIIGVLLILGAIQVTVWILKKNIIIGNGDEKHFVSVTVSGNKDENGFFVSVTVSGNKDEKRSMPDGSADSGKGS  |
| Mhc1zla <sup>3781</sup> | 321 | PIAMIAGIIGVLLILGAIQVTVWILKKNIIIGNGDEKHFVSVTVSGNKDENGFFVSVTVSGNKDEKRSMPDGSADSGKGS  |
|                         |     |                                                                                   |
| Mhc1zla <sup>3778</sup> | 392 | A                                                                                 |
| Mhc1zla <sup>3781</sup> | 401 | A                                                                                 |

**Figure S4. Sequence variation of MHC class I Z proteins.** Proteins encoded by transcripts described in manuscript are shown aligned. Transcript identity numbers are included as superscripts. Proteins encoded by alternatively spliced transcript variants (tv) are included.
